# Supplementary material for: Identifying Potential Drug-Related Problems Among Geriatric Patients With Use of an Integrated Clinical Decision Support Tool
Source: Front Pharmacol. 2022 Mar 28;13:761787. doi: 10.3389/fphar.2022.761787 (PMC8995559; doi:10.3389/fphar.2022.761787)
Supplement: Supplementary file 1 [file DataSheet1.xlsx]

## Sheet: Title page
Frontiers
Identifying potential drug-related problems among geriatric patients with use of an integrated clinical decision support tool
Veera Bobrova1,*, Daniela Fialová2,3, Shane Desselle4, Jyrki Heinämäki1, and Daisy Volmer1
1 Institute of Pharmacy, Faculty of Medicine, University of Tartu, Nooruse Str. 1, 50411 Tartu, Estonia
2 Department of Social and Clinical Pharmacy, Faculty of Pharmacy in Hradec Králové, Charles University, Czech Republic (post code: 50005)
3 Department of Geriatrics and Gerontology, 1st Faculty of Medicine, Charles University, Czech Republic (post code: 120 00)
4 Touro University California College of Pharmacy, Vallejo, CA, USA
ORCID:
Veera Bobrova 0000-0002-6282-8589
Daniela Fialová 0000-0001-5638-9690
Shane Desselle 0000-0002-5987-1391
Jyrki Heinämäki 0000-0002-5996-5144
Daisy Volmer 0000-0001-6742-5044
*Corresponding Author:
Veera Bobrova
Institute of Pharmacy, Faculty of Medicine,
University of Tartu,
Nooruse Str. 1, 50411 Tartu,
Estonia
Tel.: +372 737 5298
E-mail: veera.bobrova@ut.ee

## Sheet: Appendix 1
	High-risk PIMs with marketing authorization in Estonia
	Active substances or medication classes	The EU(7)-PIM criteria (PIM class; main reason for PIM) 1	The EURO-FORTA criteria (FORTA class; main reason for PIM=indication) 2	SmPC specific alerts for geriatric population (EMA, EST), October 2020	Result
	Prescription (Rx) PIMs
1	Agomelatine	no information	D; depression	yes	Grey PIM
2	Amantadine	does not appear as PIM	D; Parkinson's disease	yes	Grey PIM
3	Amitriptyline	A+B; peripheral anticholinergic side effects, central anticholinergic side effects, cognitive deficit, increased risk of falling	D; chronic pain	yes	Red PIM
4	Aripiprazole (2-15 mg/d)	A+B; risk of increased mortality when used for behavioural problems in dementia	D; BPSD: paranoia, hallucitation	yes	Red PIM
5	Baclofen 4	A; risk of anticholinergic and CNS side effects including orthostatic hypotension, falls, sedation, weakness, confusion, amnesia	no information	yes	Grey PIM
6	Benzodiazepines general Lorazepam (>1 mg/d), diazepam, midazolam (long-term use)	A+B/B; risk of falling with hip fracture, prolonged reaction times, psychiatric reactions, cognitive impairment, depression	D; depression (long acting), insomnia/sleep disorder (general, also short and medium half-life) D; epilepsy	yes	Red PIM
7	Bevacizumab	no information	D; breast cancer, advanced stage	yes	Grey PIM
8	Biperidene	A+B; risk of anticholinergic and CNS side effects	D; Parkinson's disease	yes	Red PIM
9	Bromocriptine	A+B; risk of CNS side effects	D; Parkinson's disease	yes	Red PIM
10	Carbamazepine	A+B; Increased risk of SIADH-like syndrome; adverse events like carbamazepine-induced confusion and agitation, atrioventricular block and bradycardia	D; bipolar disorder, chronic pain C; epilepsy	yes	Red PIM
11	Clozapine (10-50 mg/d)	A+B; Anticholinergic and extrapyramidal side effects, parkinsonism, hypotonia, sedation, risk of falling, increased mortality in persons with dementia, increased risk of agranulocytosis and myocarditis	D; BPSD: paranoia, hallucitation	yes	Red PIM
12	Dronedarone	A; frequent drug interactions; prolonged QT interval; not recommended in permanent atrial fibrillation; increased mortality due to cardiovascular causes	D; arterial fibrillation, infarction	yes	Red PIM
13	Estrogen 3	A+B; evidence for carcinogenic potential and lack of cardioprotective effect	D (except for perimenopausal); osteoporosis	not found	Red PIM
14	Gliflozins	no information	D; type II diabetes mellitus	yes	Grey PIM
15	Glipizide	A; risk of protracted hypoglycemia	no information	yes	Grey PIM
16	Insulin, sliding scale	A; no benefits demonstrated in using sliding-scale insulin; might facilitate fluctuations in glycemic levels	no information (B for insulins in general)	yes	Grey PIM
17	Nifedipine	A+B; increased risk of hypotension, myocardial infarction, increased mortality	D (if no hypertension); infarction	not found	Red PIM
18	Nimodipine	no information	D; dementia	not found	Grey PIM
19	Nitrofurantoin	A; when used >1 week; unfavorable risk/benefit ratio, particularly with long-term use (pulmonary side effects, liver damage, etc.); contraindicated if severe renal failure due to decreased excretion and increased risk of toxicity	no information	yes	Grey PIM
20	NSAIDs general (nonsteroidal anti-inflammatory drugs, for long-term use), e.g., naproxen Antiphlogistics, e.g. indomethacin	A+B for most of the active substances; very high risk of GI bleeding, ulceration, or perforation, which may be fatal	D; chronic pain D; dementia	yes	Red PIM
21	Oxybutynin (immediate-release)	A+B (sustained- and non-sustained-release); anticholinergic side effects, ECG changes	D (immediate-release); urge incontinence	yes	Red PIM
22	Piracetam	A; no efficacy proven; unfavorable risk/benefit profile	D; dementia	yes	Red PIM
23	Phenobarbital	A+B; risk of sedation, paradoxical excitation	D; epilepsy	yes	Red PIM
24	Phenytoin	A+B; narrow therapeutic window, increased risk of toxicity	D; epilepsy	not found	Red PIM
25	Pramipexole	A; side effects include orthostatic hypotension, GI tract symptoms, hallucinations, confusion, insomnia, peripheral oedema	B; Parkinson’s disease	yes	Grey PIM
26	Propafenone	A; high risk of drug interactions	D; arterial fibrillation, infarction	yes	Red PIM
27	Statins	no information	D; dementia	yes	Grey PIM
28	Systemic glucocorticoids for chronic use	no information	D; chronic obstructive pulmonary disease	yes	Grey PIM
29	Testosterone and other hormone preparations, e.g. DHEA (Dehydroepiandrosterone 8)	no information	D; dementia	yes	Grey PIM
30	Verapamil and verapamil type Ca antagonists	A+B (verapamil); may worsen constipation; risk of bradycardia	D (verapamil type Ca antagonists); arterial hypertension;	yes	Red PIM
	Over-the-Counter (OTC) PIMs
31	Acetylsalicylic acid (100 mg/d) 6	A+B (>325 mg, NSAID); may exacerbate or produce new GI ulcers, increased risk of bleeding	D; arterial fibrillation	not found	Red PIM
32	Dextromethorphan 3	A; no clear evidence in the treatment of acute cough	D; COPD	not found	Red PIM
33	Diphenhydramine 3,6	A+B; anticholinergic side effects, sedation, dizziness; electrocardiographic changes	D; insomnia/sleep disorder	not found	Red PIM
34	Ginkgo biloba 5	A; no efficacy proven; increased risk of orthostatic hypotension and fall	D; dementia	not found	Red PIM
35	Magnesium hydroxide 3, 5	A; risk of hypermagnesemia, which is higher in moderate to severe renal failure	no information	not found	Grey PIM
36	Senna glycosides 5, 6	A; adverse events include abdominal pain, fluid and electrolyte imbalance and hypoalbuminemia; may exacerbate bowel disfunction	no information	yes	Grey PIM
37	Sodium picosulfate 6	A; adverse events include abdominal pain, fluid and electrolyte imbalance and hypoalbuminemia; may exacerbate bowel dysfunction	no information	yes	Grey PIM
38	St. John’s Wort 5	no information	D; depression	not found	Grey PIM
	Dietary and other oral supplements
39	Aloe	A; abdominal pain, fluid and electrolyte imbalance and hypoalbuminemia, may exacerbate bowel disfunction	no information	not applicable	Grey PIM
40	Antioxidants: vitamin E, selenium, vitamin C	no information	D; dementia	not applicable	Grey PIM
41	Phytotherapeutic agents, e.g. ginseng	no information	D; dementia	not applicable	Grey PIM
	High-risk PIMs not authorized but still marketed in Estonia (ET, RT)
42	Desferrioxamine RT	no information	D; dementia	not found	Grey PIM
43	Cabergoline ET	A+B; risk of CNS side effects	D; Parkinson's disease	not found	Red PIM
44	Clonidine ET, RT	A+B; risk of orthostatic hypotension, bradycardia, syncope, CNS side effects	D; arterial hypertension	not found	Red PIM
45	Codeine ET, 3	B (>2 weeks); higher risk of adverse events	D; chronic obstructive pulmonary disease	yes	Grey PIM
46	Ethosuximide RT	no information	D; epilepsy	not found	Grey PIM
47	Flecainide ET, RT	A; higher rate of adverse effects, especially in older adults	D; arterial fibrillation, infarction	yes	Red PIM
48	Glibenclamide RT	A+B; risk of protracted hypoglycemia	D; type II diabetes mellitus	not found	Red PIM
49	Nandrolone decanoate RT	no information	D; osteoporosis	not found	Grey PIM
50	Niacin (=Nicotinic acid) RT	A; moderate risk of side effects; ineffective for the treatment of dementia	D; infarction	yes	Red PIM
51	Pyritinol (pyridoxine) ET, RT, 3, 5	no information	D; dementia	not found	Grey PIM
52	Reboxetine RT	does not appear as PIM	D; depression	not found	Red PIM
53	Tranylcypromine RT	A; irreversible MAO inhibitor; risk of hypertensive crises, cerebral hemorrhage and malignant hyperthermia	no information	yes	Grey PIM
54	Quinidine RT	A; CNS side effects; increased mortality	D; arterial fibrillation, infarction	yes	Red PIM
	High-risk PIMs not authorized and not marketed in Estonia
55	Butamirate	no information	D; chronic obstructive pulmonary disease	not found	Grey PIM
56	Acetyldigoxin	A; elevated glycoside sensitivity in older adults (women >men); risk of intoxication	no information	not found	Grey PIM
57	Alizapride	A; no proven efficacy; muscarinic-blocking agents; side effects such as confusion and sedation	no information	not found	Grey PIM
58	Clomethiazole (5-15 mg/d)	B; Risk of respiratory depression	D; BPSD: restlessness, agitation (aggressiveness)	not found	Red PIM
59	Disopyramide	A; potent negative inotrope; anticholinergic side effects; may induce heart failure; may cause sudden cardiac death	D; arterial fibrillation, infarction	yes	Red PIM
60	Doxepin	A+B; Peripheral anticholinergic side effects, central anticholinergic side effects, cognitive deficit, increased risk of falling	D; insomnia/sleep disorder C; BPSD: sleep disorder	not found	Red PIM
61	Docusate sodium	A; stool softener laxative; adverse events include cramping, nausea, diarrhea; may exacerbate bowel disfunction	no information	not found	Grey PIM
62	Ergotamine	A; unfavorable risk/benefit profile	D; dementia	yes	Red PIM
63	Ethylmorphine	A; no clear evidence in the treatment of acute cough	D; COPD	not found	Red PIM
64	Fluoride	no information	D; osteoporosis	not found	Grey PIM
65	Meprobamate	A; risk of drowsiness, confusion	no information	yes	Grey PIM
66	Methocarbamol	A; risk of anticholinergic and CNS side effects including orthostatic hypotension, falls, sedation, weakness, confusion, amnesia	no information	yes	Grey PIM
67	Metildigoxin	A; elevated glycoside sensitivity (women >men); risk of intoxication	no information	not found	Grey PIM
68	Metopimazine	A; no proven efficacy; muscarinic blocking agent; side effects such as confusion and sedation	no information	not found	Grey PIM
69	Minoxidil 7 (non topical formulation)	no information	D; arterial hypertension	not found	Grey PIM
70	Nicardipine	A+B; risk of orthostatic hypotension, myocardial infarction or stroke	D (if no hypertension); infarction	not found	Red PIM
71	Norephedrine (=Phenylpropanolamine)	A; higher risk of elevation of blood pressure secondary to sympathomimetic activity	no information	not found	Grey PIM
72	Opipramol	no information	D; insomnia/sleep disorder	not found	Grey PIM
73	Pipamperone (20-120 mg/d)	no information	D; BPSD: restlessness, agitation (aggressiveness) C; insomnia/sleep disorder	not found	Grey PIM
74	Procainamide	A; high risk of drug interactions	D; arterial fibrillation, infarction	not found	Red PIM
75	Quinidine + verapamil	A; CNS side effects and increased mortality	no information	yes	Grey PIM
76	Rosiglitazone	no information	D; type II diabetes mellitus	yes	Grey PIM
77	Selegiline	A; increased risk of orthostatic hypotension and dizziness	C; Parkinson’s disease and D; dementia	not found	Red PIM
78	Strontium ranelate	does not appear as PIM	D, osteoporosis	yes	Grey PIM
79	Sulfonylureas, 1st generation	A+B; risk of protracted hypoglycemia	D; type II diabetes mellitus	not found	Red PIM
80	Tetrazepam	A; risk of anticholinergic and CNS side effects including orthostatic hypotension, falls, sedation, weakness, confusion, amnesia	no information	not found	Grey PIM
81	Viscous paraffin (=Liquid paraffin, oral)	A; pulmonary side effects if aspirated	no information	not found	Grey PIM
	1 Renom-Guiteras A, Meyer G, Thürmann, PA. The EU(7)-PIM list: a list of potentially inappropriate medications for older people consented by experts from seven European countries. Eur J Clin Pharmacol. 2015; https://doi.org/10.1007/s00228-015-1860-9
	2 Pazan F, Weiss C, Wehling M. The EURO-FORTA (Fit fOR The Aged) list: international consensus validation of a clinical tool for improved drug treatment in older Poeople. Drugs Aging. 2018; https://doi.org/10.1007/s40266-017-0514-2
	3 used in combinations with other active ingredients
	4 oral drug use is available only as ET medication
	5 used both as OTC drug and food supplement
	6 used in addition as RT drug
	7 in Estonia only topical formulation (D11AX01)
	8 not used in Estonia
	DDD - defined daily doses
	EMA - European Medicines Agency
	PIM - potentially inappropriate medication
	SmPC - Summaries of Product Characteristics
	ET (Erialaorganisatsiooni Taotlusega ravimid, est) and RT (Ravimiameti Taotlusega ravimid, est): used by application of specialized physician, hospitals or research institutions

## Sheet: Appendix 2
	Moderate-risk PIMs
	Active substances or medication classes	The EU(7)-PIM criteria (PIM class; main reason for PIM) 1	The EURO-FORTA criteria (FORTA class; main reason for PIM=indication) 2	Factors based on the EU(7)-PIM 1 and EURO-FORTA 2 criteria affecting the risk 3 for older patient	Risk 3	Result
1	Betablockers	A+B/B (non-selective beta-adrenergic blocker); may exacerbate or cause respiratory depression, possible CNS adverse events	B; arterial hypertension C; infaction (used longer than 3 years)	Adverse events Dosing Treatment indication Renal functions	Moderate	Yellow PIM
2	Spironolactone	A+B, >25 mg/d; higher risk of hyperkalaemia and hyponatremia	C; arterial hypertension B; cardiac insufficiency	Adverse events Dosing Treatment indication Renal functions	Moderate	Yellow PIM
3	Alpha blockers general	no information	C; arterial hypertention	Treatment indication	Moderate	Grey PIM
4	Moxonidine	A+B; risk of orthostatic hypotension, bradycardia, syncope, CNS side effects	C; arterial hypertention	Adverse events Dosing Treatment indication Renal functions	Moderate	Yellow PIM
5	Aliskiren	no information	C; arterial hypertention	Treatment indication	Moderate	Grey PIM
6	Urapidil	A+B; risk of orthostatic hypotension, dry mouth, urinary incontinence/impaired micturition, CNS side effects	C; arterial hypertention	Adverse events Dosing Treatment indication Renal functions	Moderate	Yellow PIM
7	Digitalis preparations (e.g., digoxin, digitoxin)	A+B for digoxin; does not appear as PIM for digitoxin; elevated glycoside sensitivity (women >men), risk of intoxication	General: C; cardiac insufficiency For digoxin: B; arterial fibrillation For digitoxin: C; arterial fibrillation	Dosing Gender (risk for women >men) Renal functions Treatment indication	Moderate	Yellow PIM
8	Ivabradine	does not appear as PIM; adverse events include first-degree AV block, ventricular extrasystoles, dizziness and blurred vision	C; cardiac insufficiency, acute coronary syndrome	Adverse events Dosing Treatment indication Renal functions	Moderate	Yellow PIM
9	Nitrates, long-term	no information	C; acute coronary syndrome, infarction	Treatment indication	Moderate	Grey PIM
10	Gp IIb/IIIa antagonists (glycoprotein 2b/3a inhibitors)	no information	C; acute coronary syndrome	Treatment indication	Moderate	Grey PIM
11	Fibrates	no information	C; infarction	Treatment indication	Moderate	Grey PIM
12	Ezetimibe	no information	C; infarction	Treatment indication	Moderate	Grey PIM
13	Amiodarone	A+B; QT interval problems and risk of provoking torsades de pointes	C; infarction, arterial fibrillation	Adverse events Dosing Treatment indication	Moderate	Yellow PIM
14	Dabigatran	B; limited information on use for older adults and on the risk of bleeding events in this population, no reversal agent is available in case of overdose	C	Adverse events Dosing Treatment indication Renal functions	Moderate	Yellow PIM
15	Low molekular weight heparin	no information	C; arterial fibrillation	Treatment indication	Moderate	Grey PIM
16	Diltiazem, verapamil	A+B; may worsen constipation; risk of bradycardia	C; arterial fibrillation	Adverse events Dosing Treatment indication	Moderate	Yellow PIM
17	Inhalative glycocorticoids	no information	C; COPD	Treatment indication	Moderate	Grey PIM
18	Theophylline	A+B; risk of CNS stimulant effects	C; COPD	Adverse events Dosing Treatment indication	Moderate	Yellow PIM
19	Mucolytic agents, e.g., acetyl cystein, bromhexine	no information	C; COPD	Treatment indication	Moderate	Grey PIM
20	Rolfumilast	no information	C; COPD	Treatment indication	Moderate	Grey PIM
21	Teriparatide	no information	C; osteoporosis	Treatment indication	Moderate	Grey PIM
22	Alfacalcidol	no information	C; osteoporosis	Treatment indication	Moderate	Grey PIM
23	Parathormone	no information	C; osteoporosis	Treatment indication	Moderate	Grey PIM
24	3rd generation sulfonylureas (glimepiride)	A+B; risk of protracted hypoglycemia	C; type II diabetes mellitus	Adverse events Dosing Treatment indication Renal functions	Moderate	Yellow PIM
25	Glinines	no information	C; type II diabetes mellitus	Treatment indication	Moderate	Grey PIM
26	Pioglitazone	B; age-related risks include bladder cancer, fractures and heart failure, use >1 year associated with an increased risk of bladder cancer, may increase the incidence of fractures of the upper arms, hands and feet in female diabetics, can cause fluid retention, which may exacerbate or precipitate heart failure	C; type II diabetes mellitus	Adverse events Duration of treatment Treatment indication	Moderate	Yellow PIM
27	Memantine	beneficial medication as alternative to several PIMs (e.g., methylphenidat, piracetam, ginkgo biloba)	C; dementia	Treatment indication	Moderate	Grey PIM
28	SSRI in the usual doses Citalopram (10-30mg for BPSD: restlessness, agitation)	A+B (fluoxetine); CNS side effects, hyponatremia B (paroxetine); risk of all-cause mortality, higher risk of seizures, falls and fractures, anticholinergic adverse effects	C; BPSD general, chronic pain B; depression	Adverse events Dosing Treatment indication Renal functions	Moderate	Yellow PIM
29	Mirtazapine 15-45mg/d	beneficial medication as alternative to several PIMs (e.g., lithium, several benzodiazepines, zopiclone, some antidepressants)	C; BPSD general (15-45mg/d); sleep disorder (15-30mg/d); depression; insomnia/sleep disorder	Treatment indication	Moderate	Grey PIM
30	SNRI	does not appear as PIM (venlafaxine); risk of all-cause mortality, attempted suicide, stroke, seizures, upper gastrointestinal bleeding, falls and fracture	C; BPSD general, depression	Adverse events Dosing Treatment indication Renal functions	Moderate	Yellow PIM
31	Risperidone (0.5-1mg/d)	A+B, >6 weeks; problematic risk-benefit profile for the treatment of behavioural symptoms of dementia, increased mortality, with higher dose, in patients with dementia	C; BPSD:paranoia, hallucination; restlessness, agitation	Adverse events Dosing Co-morbidity (dementia) Treatment duration Renal functions	Moderate	Yellow PIM
32	Melperone (25-150mg/d)	no information	C; BPSD:paranoia, hallucination; restlessness, agitation; insomnia/sleep disorder	Treatment indication	Moderate	Grey PIM
33	Quetiapine (25-200mg/d)	beneficial medication as alternative to several PIMs (e.g., risperidone, aripiprazole, levomepromazine, haloperidol)	C; BPSD:paranoia, hallucination; restlessness, agitation; depression B; bipolar disorder	Treatment indication	Moderate	Grey PIM
34	Haloperidol (0.5-3mg/d)	A+B, >2 mg single dose; >5mg/d; anticholinergic and extrapyramidal side effects, parkinsonism, hypotonia, sedation, risk of falling, increased mortality in persons with dementia	C; BPSD:paranoia, hallucination	Adverse events Dosing Treatment duration	Moderate	Yellow PIM
35	Trazodone (50-200mg/d)	beneficial medication as alternative to several PIMs (e.g., lithium, several benzodiazepines, some antidepressants)	C; BPSD:restlessness, agitation; depression	Treatment indication	Moderate	Yellow PIM
36	Slow release melatonin	no information	C; BPSD: sleep disorder (2-4mg) B; insomnia, sleep disorder	Treatment indication	Moderate	Grey PIM
37	Zopiclone	A+B, >3.75 mg/d; risk of falls and hip fracture, prolonged reaction time, psychiatric reactions, cognitive impairment and depression	C; BPSD: sleep disorder (3.75-7.5mg); insomnia/sleep disorder	Adverse events Dosing Treatment duration	Moderate	Yellow PIM
38	Zolpidem	A+B, >5 mg/d; risk of falls and hip fracture, prolonged reaction time, psychiatric reactions, cognitive impairment and depression	C; BPSD: sleep disorder; insomnia/sleep disorder	Adverse events Dosing Treatment duration	Moderate	Yellow PIM
39	Nortritpylline	A+B; peripheral anticholinergic side effects, central anticholinergic side effects, cognitive deficit, increased risk of falling	C; depression	Adverse events Dosing Treatment indication	Moderate	Yellow PIM
40	Moclobemide	no information	C; depression	Treatment indication	Moderate	Grey PIM
41	Bupropion	B; may lower seizure threshold	C; depression	Adverse events Dosing Treatment indication Renal functions	Moderate	Yellow PIM
42	Vortioxetine	no information	C; depression	Treatment indication	Moderate	Grey PIM
43	Olanzapine	A+B, >10 mg/d; anticholinergic and extrapyramidal side effects, parkinsonism, hypotonia, sedation, risk of falling, increased mortality in persons with dementia	C; depression	Adverse events Co-morbidity (dementia) Treatment indication	Moderate	Yellow PIM
44	Short-acting benzodiazepines	A+B; risk of falling with hip fracture, prolonged reaction times, psychiatric reactions, cognitive impairment, depression	C; depression	Adverse events Dosing Treatment indication	Moderate	Yellow PIM
45	Litium	A+B; narrow therapeutic window, cumulation in renal failure	C; bipolar disorder	Adverse events Dosing Treatment indication Renal functions	Moderate	Yellow PIM
46	Valproic acid	beneficial medication as alternative to several PIMs (e.g., phenobarbital, phenytoin, carbamazepine)	C; bipolar disorder; epilepsy	Treatment indication	Moderate	Grey PIM
47	Lamotrigine	beneficial medication as alternative to several PIMs (e.g., phenobarbital, phenytoin, carbamazepine)	C; bipolar disorder B; epilepsy	Treatment indication	Moderate	Grey PIM
48	Zaleplone	A+B, >5 mg/d; risk of falls and hip fracture, prolonged reaction time, psychiatric reactions, cognitive impairment and depression	C; insomnia/sleep disorder	Adverse events Dosing Treatment duration Treatment indication	Moderate	Yellow PIM
49	Naloxone/tilidine Naloxone/oxycodone	beneficial medication as alternative to several PIMs (opioids with lower risk of delirium)	C; chronic pain	Treatment indication	Moderate	Grey PIM
50	Morphine	beneficial medication (opioids with lower risk of delirium) as alternative to several PIMs (e.g., codeine, phenylbutazone, diclofenac, piroxicam)	C; chronic pain	Treatment indication	Moderate	Grey PIM
51	Pregabalin/gabapentin (only for neuropathic pain)	no information	C; chronic pain (neuropathic pain)	Treatment indication	Moderate	Grey PIM
52	Metamizole	no information	C; chronic pain	Treatment indication	Moderate	Grey PIM
53	Tramadol	B; more adverse effects in older adults, CNS side effects such as confusion, vertigo and nausea	C; chronic pain	Adverse events Dosing Treatment indication Renal functions	Moderate	Yellow PIM
54	Pregabalin (only for epilepsy)	no information	C; epilepsy	Treatment indication	Moderate	Grey PIM
55	Eslicarbazepine	no information	C; epilepsy	Treatment indication	Moderate	Grey PIM
56	Lacosamide	no information	C; epilepsy	Treatment indication	Moderate	Grey PIM
57	Zonisamide	no information	C; epilepsy	Treatment indication	Moderate	Grey PIM
58	Diazepam, midazolam	no information (for epilepsy, emergency use)	C, epilepsy, emergency use	Treatment indication	Moderate	Grey PIM
59	Oxcarbamazepine	no information	C; epilepsy	Treatment indication	Moderate	Grey PIM
60	Piribedil	A+B; risk of orthostatic hypotension and falls	B; Parkinson's disease	Adverse events Treatment indication	Moderate	Yellow PIM
61	Rasagiline	beneficial medication as alternative to several PIMs (e.g., cabergoline, selegiline)	C; Parkinson's disease	Treatment indication	Moderate	Grey PIM
62	Fesoterodine	A+B; higher incidence of antimuscarinic adverse events and urinary tract infection in persons aged 75 years and older compared with younger patients	B; incontinence	Adverse events Dosing Treatment indication Renal functions	Moderate	Yellow PIM
63	Oxybutynin (extended-release)	A+B (sustained- and non-sustained-release); anticholinergic side effects, ECG changes (prolonged QT)	C; incontinence	Adverse events Dosing Treatment indication	Moderate	Yellow PIM
64	Tolterodine, Trospium chloride	A+B; anticholinergic side effects, ECG changes (prolonged QT)	C; incontinence	Adverse events Dosing Treatment indication Renal functions	Moderate	Yellow PIM
65	H2 receptor antagonists	A+B/B; CNS adverse effects including confusion	C; gastrointestinal illnesses/concomitant therapy with NSAIDs	Dosing Treatment indication Renal functions	Moderate	Yellow PIM
	Low-risk PIMs
1	Diuretics except spironolactone	no information	B; arterial hypertension, cardiac insufficiency	Treatment indication	Low	Grey PIM
2	Trombolytics, especially rTPA (recombinant tissue-type plasminogen activator)	no information	B; acute coronary syndrome	Treatment indication	Low	Grey PIM
3	Dipyridamole+acetylsalicylic acid	no information	B; stroke	Treatment indication	Low	Grey PIM
4	New Oral anticoagulants (NOACs) except dabigatran	B (for rivaroxaban and apixaban); limited information on use for older adults, risk of bleeding events, no reversal agent available in case of overdose, risk of bleeding may be higher in cases of severe renal failure	B; arterial fibrillation	Adverse events Dosing Treatment indication Renal functions	Low	Green PIM
5	Oral anticoagulation by vitamin-K-antagonists	B (for acenocoumarol); risk of bleeding, especially in people with difficult control of INR value	B; arterial fibrillation	Adverse events INR Treatment indication	Low	Green PIM
6	Inhalative beta 2 mimetic agents	no information	B; COPD	Treatment indication	Low	Grey PIM
7	Raloxifen for women	no information	B; osteoporosis	Gender Treatment indication	Low	Grey PIM
8	Bisphosphonates	beneficial medication as alternative to PIM (strontium ranelate )	B; osteoporosis	Treatment indication	Low	Green PIM/not PIM
9	DPP4 (Dipeptidylpeptidase) inhibitiors	does not appear as PIM (sitagliptine, vildagliptine); limited safety data is available for adults aged ≥75 years old, subjects aged 65 to 80 years had higher plasma concentrations than younger subjects, risk of hypoglycemia, dizziness, headache and peripheral oedema	B; type II diabetes mellitus	Adverse events Dosing Treatment indication Renal functions	Low	Green PIM
10	Insulin, general	no information	B; type II diabetes mellitus	Treatment indication	Low	Grey PIM
11	Metformin	beneficial medication as alternative to several PIMs (e.g., glipizide, acarbose, vildagliptine)	B; type II diabetes mellitus	Treatment indication	Low	Green PIM/not PIM
12	GLP1 (Glucagon-Like-Peptide-1) analogs	no information	B; type II diabetes mellitus	Treatment indication	Low	Grey PIM
13	Acarbose	does not appear as PIM; no proven efficacy	B; type II diabetes mellitus	Treatment indication	Low	Green PIM
14	Acetylcholinesterase inhibitors	no information	B; dementia	Treatment indication	Low	Grey PIM
15	Opioids, e.g., buprenorphine, oxycodone, hydromorphine	beneficial medication (opioids with lower risk of delirium) as alternative to several PIMs (e.g., diclofenac, etoricoxib)	B; chronic pain	Treatment indication	Low	Green PIM/not PIM
16	Methadone	B; very long-acting especially in the elderly	B; chronic pain	Dosing Dutation of treatment Treatment indication Renal functions	Low	Green PIM
17	Levetiracetam	beneficial medication as alternative to several PIMs (e.g., phenobarbital, phenytoin, clonazepam)	B; epilepsy	Treatment indication	Low	Green PIM/not PIM
18	Gabapentin (only for epilepsy)	beneficial medication as alternative to several PIMs (e.g., phenobarbital, phenytoin, clonazepam)	B; epilepsy	Treatment indication	Low	Green PIM/not PIM
19	Lorazepam	no information (for epilepsy, emergency use)	B; epilepsy, emergency use	Treatment indication	Low	Grey PIM
20	Topiramate	B; risk of cognitive-related dysfunction	B; epilepsy	Adverse events Dosing Treatment indication Renal functions	Low	Green PIM
21	Entacapone	no information	B; Parkinson's disease	Treatment indication	Low	Grey PIM
22	Ropinirole, pergolide, rotigotine	B; risk of orthostatic hypotension, hallucinations, confusion, somnolence, nausea (ropinirole); dyskinesia, dizziness, hallucinations, dystonia, confusion, somnolence, insomnia, anxiety, nausea (pergolide), orthostatic hypotension, headache, nausea, fatigue, sleep disorder, sudden onset of sleep, somnolence (rotigotine)	B; Parkinson's disease	Adverse events Dosing Treatment indication	Low	Green PIM
23	Quinagoline	no information	B; Parkinson's disease	Treatment indication	Low	Grey PIM
24	Proton pump inhibitors (PPIs)	B, >8 weeks; long-term high dose therapy is associated with an increased risk of C. difficile infection and hip fracture	B; gastrointestinal illnesses/concomitant therapy with NSAIDs (only if absolutely necessary)	Adverce events Dosing Duration of treatment Treatment indication	Low	Green PIM
25	Iron preparations	B, >325 mg/d; doses >325 mg/d do not considerably increase the amount absorbed but greatly increase the incidence of constipation	B; anemia (in patients with cardiac insufficiency, no proof of iron deficiency)	Adverse events Treatment indication	Low	Green PIM
	Other moderare- or low-risk PIMs 4
	Based on the EU(7)-PIM list 1 Active substances or medication classes (EU(7)-PIM class)			Based on the EURO-FORTA list 2 Active substances or medication classes (EURO-FORTA class, indication)
1	Aluminium-containing antacids (A+B)	Buflomedil (B)	Zuclopenthixol (A+B)	Hormone therapy, e.g., tamoxifen, aromatase inhibitors (B; breast cancer, adjuvant therapy and advanced stage)
2	Mebeverine (Does not appear as PIM)	Naftidrofuryl (A+B)	Pimozide (B)	Immunotherapy / “Targeted” therapy Trastuzumab, lapatinib (B; breast cancer, adjuvant therapy and advanced stage)
3	Trimebutine (B)	Hidrosmin (B)	Chloralhydrate (A+B)	Chemotherapy, e.g., CMF (Combination cyclophosphamide, methotrexate, 5- Fluorouracil) AC/EC Regimen (anthracycline/ epirubicin, cyclophosphamide) (C, breast cancer, adjuvant therapy)
4	Dihexyverine (A+B)	Escin (=Aescin) (B)	Propiomazine (B)	Chemotherapy, e.g., anthracyclins, taxanes (C; breast cancer, advanced stage)
5	Otilonium bromide (B)	Vincamine-Rutoside (A+B)	Aceprometazine (A+B)	FOLFOX Regimen (Folinic acid, Fluorouracil, Oxaliplatin) (C; colorectal carcinoma, adjuvant therapy and advanced therapy)
6	Tiemonium (iodide) (A+B)	Troxerutin-Vincamine (A+B)	Desipramine (B)	5-Fluorouracil based infusion regimen (C; colorectal carcinoma, adjuvant therapy)
7	Pinaverium (Does not appear as PIM)	Flavoxat (B)	Imipramine (A+B)	Capecitabine (C; colorectal carcinoma, adjuvant therapy)
8	Hyoscyamine (A+B)	Solifenacin (A+B)	Clomipramine (A+B)	VEGF (Vascular Endothelial Growth Factor) Inhibition Bevacizumab (C; colorectal carcinoma, advanced therapy)
9	Belladonna alkaloids (A+B)	Trospium (A+B)	Trimipramine (A+B)	EGFR (Epidermal- Growth-Factor- Receptor) Inhibition Cetuximab, Panitumumab (C; colorectal carcinoma, advanced therapy)
10	Clidinium-Chlordiazepoxide (A+B)	Darifenacin (A+B)	Dosulepin (A+B)	Adjuvant chemotherapy (cisplatin-based) (C; bronchial carcinoma, adjuvant therapy)
11	Pitofenone (A+B)	Terazosin (A+B)	Amoxapine (A+B)	Docetaxel, Vinorelbin (B; bronchial carcinoma, advanced stage)
12	Metoclopramide (A+B)	Ofloxacin (does not appear as PIM)	Maprotiline (A+B)	Primary combination therapy cisplatin/gemcitabi n, or cisplatin/vinorelbin (C; bronchial carcinoma, advanced stage)
13	Domperidone (>30 mg/d) (Does not appear as PIM)	Carisoprodol (A+B)	Fluvoxamine (B)	ECF Regime (Epirubicin, Cisplatin, 5- Fluorouracil) (B; gastric cancer)
14	Dimenhydrinate (A+B)	Orphenadrine (A+B)	Bupropion (B)	MDS (Myelodysplastic syndrome) Azacytidine (B; hematological neoplasias)
15	Scopolamine (A+B)	Tizanidine (A+B)	Methylphenidat (A+B)	AML (Acute myeloid leukemia) Anthracyclines + cytosine arabinoside (cytarabine) (B; hematological neoplasias)
16	Bisacodyl (>3 days) (A+B)	Cyclobenzaprine (A+B)	Ergoloid mesylate (dihydroergotoxine) (A+B)	CLL (Chronic lymphatic leukemia) Chlorambucil, Fludarabin, Bendamustin (B; hematological neoplasias)
17	Castor oil (=Ricinus communis, =Neoloid) (A+B)	Colchicin (B)	Bethanechol (Does not appear as PIM)	CLL Obinutuzumab (B; hematological neoplasias)
18	Cascara sagrada (A+B)	Quinine and derivatives (does not appear as PIM)	Pseudoephedrine (B)	CLL Rituximab (B; hematological neoplasias)
19	Prucalopride (Does not appear as PIM)	Pethidine (=Meperidine) (A+B)	Terbutaline (oral) (Does not appear as PIM)	Multiple myeloma Primary therapy with prednisolone, thalidomide, melphalan (B; hematological neoplasias)
20	Diphenoxylate-Atropine (A+B)	Pentazocine (A+B)	Clemastine (A+B)	Bortezomib (B; hematological neoplasias)
21	Loperamide (>2 days) (Does not appear as PIM)	Triptanes (e.g. Sumatriptan, Eletriptan, Naratriptan, Zolmitriptan) (does not appear as PIM)	Carbinoxamine (A+B)	Lenalidomide (B; hematological neoplasias)
22	Racecadotril (Does not appear as PIM)	Clonazepam (A+B)	Doxylamine (A+B)	CLL Ibrutinib (C; hematological neoplasias)
23	Ticlopidine (A+B)	Trihexyphenidyl (A+B)	Brompheniramine (A+B)	CLL Idelalisib (C; hematological neoplasias)
24	Dipyridamole (A+B)	Tropatepin (A+B)	Dexchlorpheniramine (A+B)	Erythropoesis Stimulating Agents, ESA (B; oncological supportive therapy)
25	Prasugrel (A+B)	Benzatropine (B)	Dimetindene (A+B)
26	Trimetazidine (Does not appear as PIM)	Dihydroergocryptine (A+B)	Chlorpheniramine (=Chlorphenamine) (A+B)
27	Reserpine (A+B)	Chlorpromazine (A+B)	Pheniramine (A+B)
28	Methyldopa (A+B)	Levomepromazine (A+B)	Dexchlorpheniramine-Betamethason (A+B)
29	Guanfacine (A; B)	Clorazepate-Acepromazine (A+B)	Tripelennamine (B)
30	Rilmenidine (A+B)	Cyamemazine (A+B)	Alimemazine (A+B)
31	Prazosin (A+B)	Fluphenazine (A+B)	Promethazine (A+B)
32	Doxazosin (A+B)	Perphenazine (A+B)	Mequitazine (A+B)
33	Guanethidine (does not appear as PIM)	Prochlorperazine (A+B)	Oxomemazine (A+B)
34	Hydralazine (B)	Trifluoperazine (A+B)	Buclizine (A+B)
35	Pentoxifylline (A+B)	Propericiazine (=Periciazine) (A+B)	Cyclizine (A+B)
36	Nicergoline (A+B)	Thioridazine (A+B)	Meclozine (A+B)
37	Dihydroergocristine (A, B)	Pipotiazine (A+B)	Cyproheptadine (A+B)
38	Raubasine-Dihydroergocristine (A+B)	Droperidol (B)	Triprolidine (A+B)
39	Cyclandelate (=Cyclospasmol) (B)	Sertindole (A+B)	Terfenadine (Does not appear as PIM)
40	Vincamine (A+B)	Ziprasidone (B)	Ebastine (Does not appear as PIM)
41	Moxisylyte (A+B)	Flupentixole (A+B)	Pimethixene (A+B)
42	Vinburnine (A+B)	Chlorprothixen (A+B)	Hydroxyzine (A+B)
	1 Renom-Guiteras A, Meyer G, Thürmann, PA. The EU(7)-PIM list: a list of potentially inappropriate medications for older people consented by experts from seven European countries. Eur J Clin Pharmacol. 2015; https://doi.org/10.1007/s00228-015-1860-9
	2 Pazan F, Weiss C, Wehling M. The EURO-FORTA (Fit fOR The Aged) list: international consensus validation of a clinical tool for improved drug treatment in older Poeople. Drugs Aging. 2018; https://doi.org/10.1007/s40266-017-0514-2
	3 The risk for these PIMs can change (from moderate to low/from low to moderate) depending on an individual patient
	4 PIMs that need more information in order to spesify the risk (moderate or low) and require further reseacrh
